# Supplementary material for: Precision Oncology-Based Targeting of Signaling Pathways toward a Holistic Approach to Cancer Therapeutics
Source: Preprints.org preprint supplement (doi:10.20944/preprints202207.0432.v2), 2022-08-16
Supplement: Supplementary file 1 [file supplementary]

Precision Oncology-Based Targeting of Signaling Pathways toward a Holistic Approach to Cancer Therapeutics | Withdrawn | Preprints.org 


- Submit preprint
- How it Works
- Instructions for Authors
- Subject Areas
- Advisory Board
- screening preprints
- About
- Awards
- Log in/Register


- Instructions for Authors
- Awards
- About
- FAQ
- Submit
  Log in/Register

preprints.org
>
medicine and pharmacology
>
oncology and oncogenics
>
doi: 10.20944/preprints202207.0432.v2

Preprint
Review
Version 2
This version is not peer-reviewed

# Precision Oncology-Based Targeting of Signaling Pathways toward a Holistic Approach to Cancer Therapeutics

Manish Kumar

This preprint has been withdrawn.

Preprints.org is a free preprint server subsidized by MDPI in Basel, Switzerland.

Contact us

 RSS

##### MDPI Initiatives

- SciProfiles
- Sciforum
- Encyclopedia
- MDPI Books
- Scilit
- Proceedings
- JAMS

##### Important links

- How it Works
- Advisory Board
- FAQ
- Friendly Journals
- Instructions for Authors
- About
- Statistics

##### Subscribe

Choose the area that interest you and we will send you notifications of new preprints at your preferred frequency.

Subscribe

#### Subscribe

---

Submit

×

© 2024 MDPI (Basel, Switzerland) unless otherwise stated

Disclaimer

Privacy Policy

Terms of Use

**We use cookies on our website to ensure you get the best experience.**
  
**Read more about our cookies here.**

OK

RSS feed for

Preprints: The Multidisciplinary Preprint Platform

Paste the URL in your RSS reader:

https://www.preprints.org/rss

If you want to subscribe our website in subject-wide, you could find the URL by choosing in the following:

select
Arts and Humanities
Biology and Life Sciences
Business, Economics and Management
Chemistry and Materials Science
Computer Science and Mathematics
Engineering
Environmental and Earth Sciences
Medicine and Pharmacology
Physical Sciences
Public Health and Healthcare
Social Sciences

https://www.preprints.org/rss

Please note that by using ScienceDirect RSS feeds, you agree to our Terms of Use and Privacy Policy.

×
